# Supplementary material for: Alteration of Anticancer and Protein-Binding Properties of Gold(I) Alkynyl by Phenolic Schiff Bases Moieties
Source: MDPI journal article supplement (doi:10.3390/pharmaceutics13040461), 2021-03-29
Supplement: s1 [file s1]

# Supplementary Materials: Alteration of Anticancer and Protein-binding Properties of Gold(I) Alkynyl by Phenolic Schiff Bases Moieties

Bandar A. Babgi \*, Jalal Alsayari, Hana M. Alenezi, Magda H. Abdellatif, Naser E. Eltayeb, Abdul-Hamid M. Emwas, Mariusz Jaremko \* and Mostafa A. Hussien

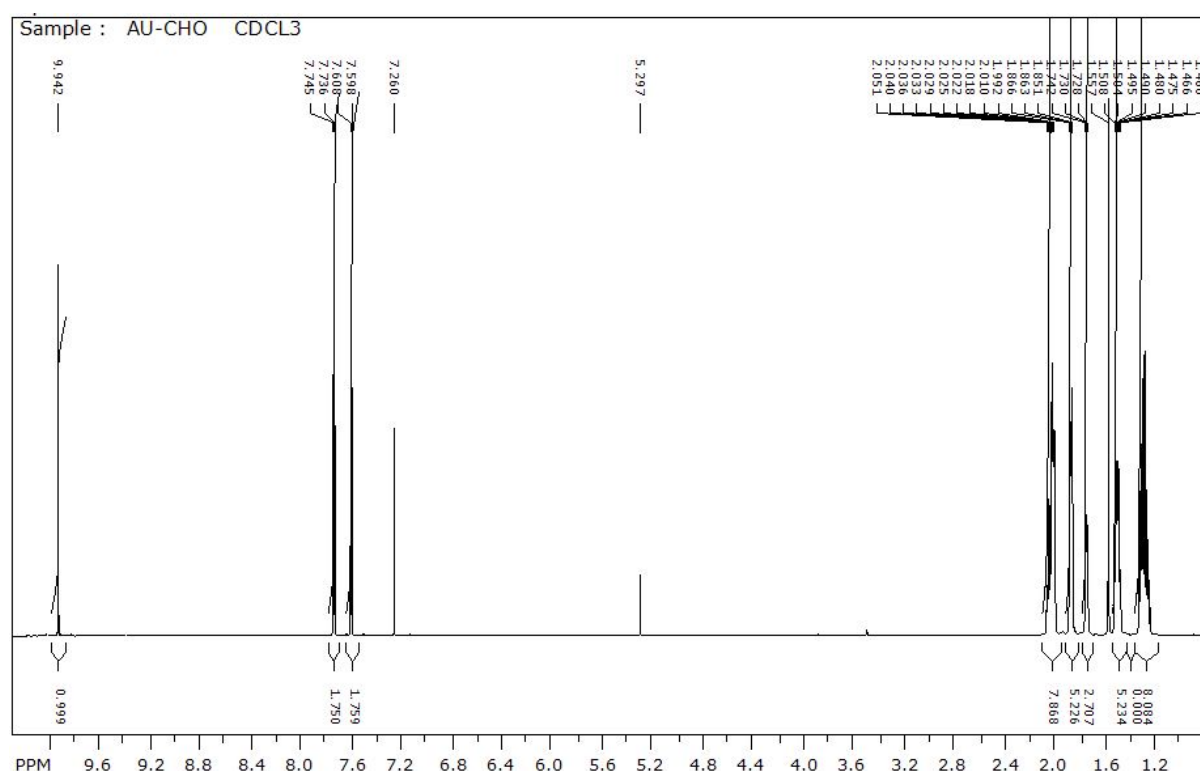

**Figure S1.** <sup>1</sup>H NMR for complex 2.

**Publisher's Note:** MDPI stays neutral with regard to jurisdictional claims in published maps and institutional affiliations.

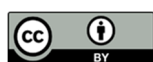

**Copyright:** © 2021 by the authors. Submitted for possible open access publication under the terms and conditions of the Creative Commons Attribution (CC BY) license (<http://creativecommons.org/licenses/by/4.0/>).

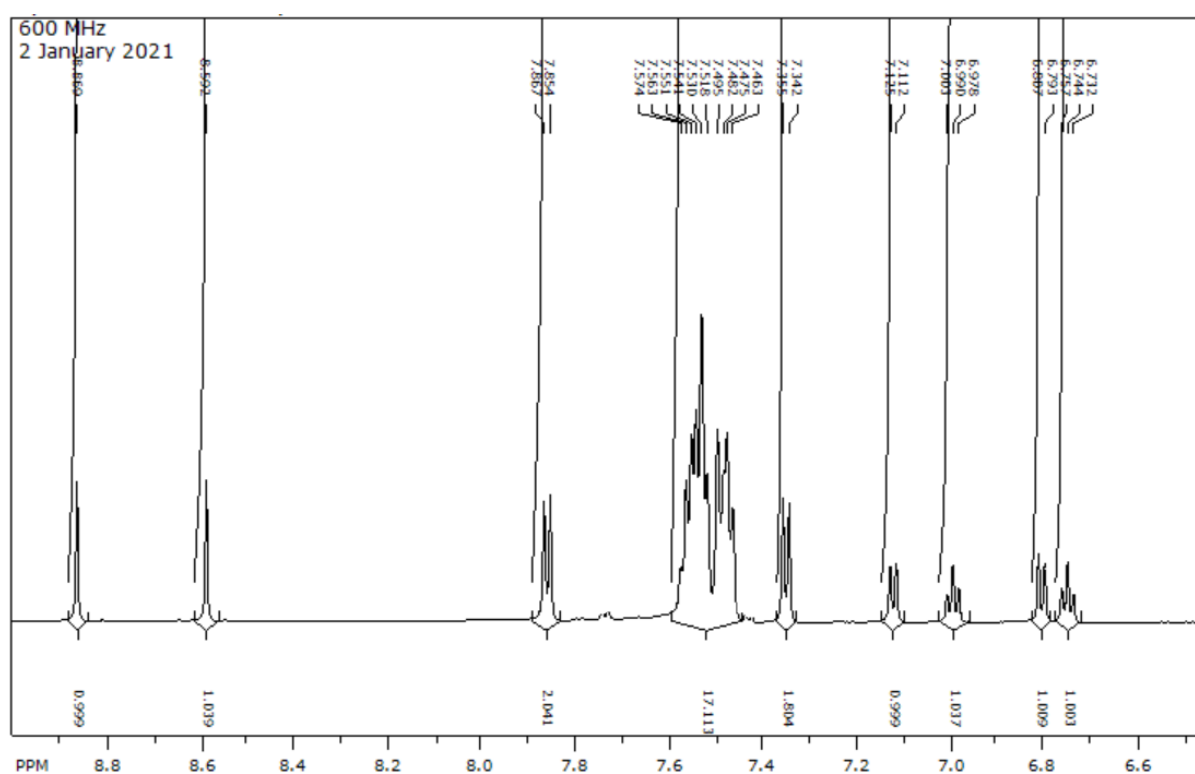Figure S2.  $^1\text{H}$  NMR for complex 3.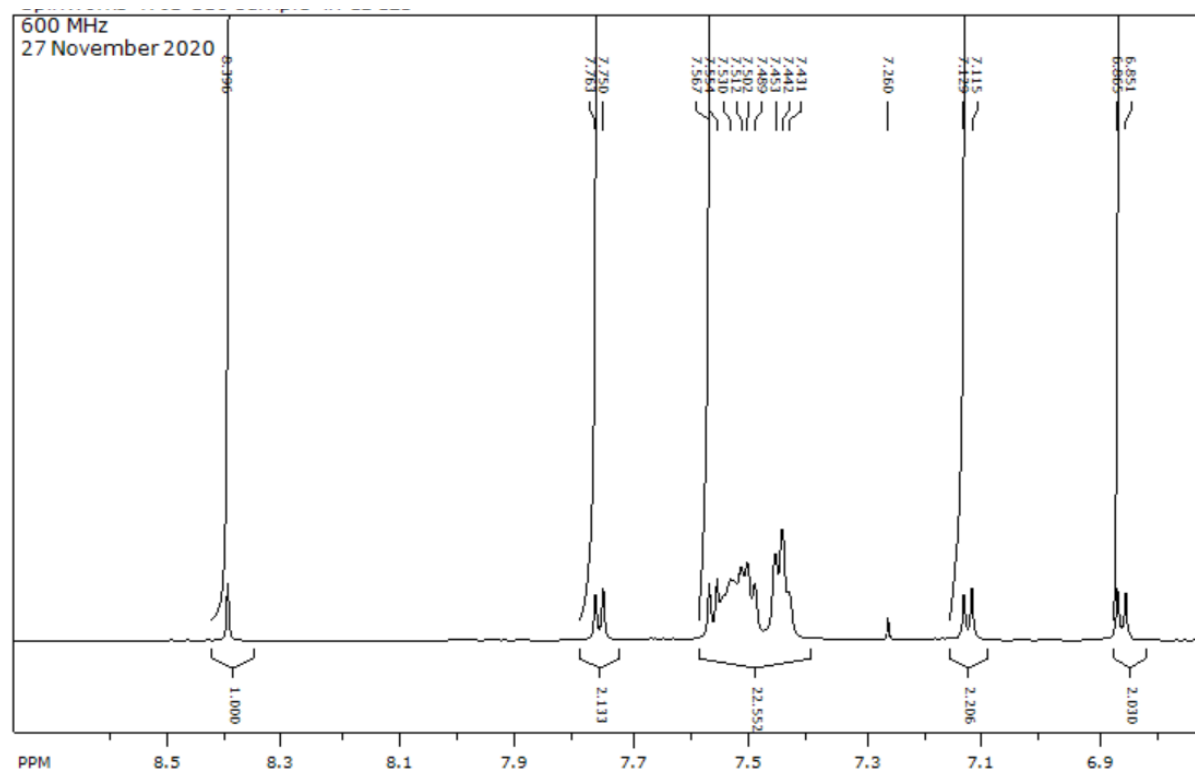Figure S3.  $^1\text{H}$  NMR for complex 4.

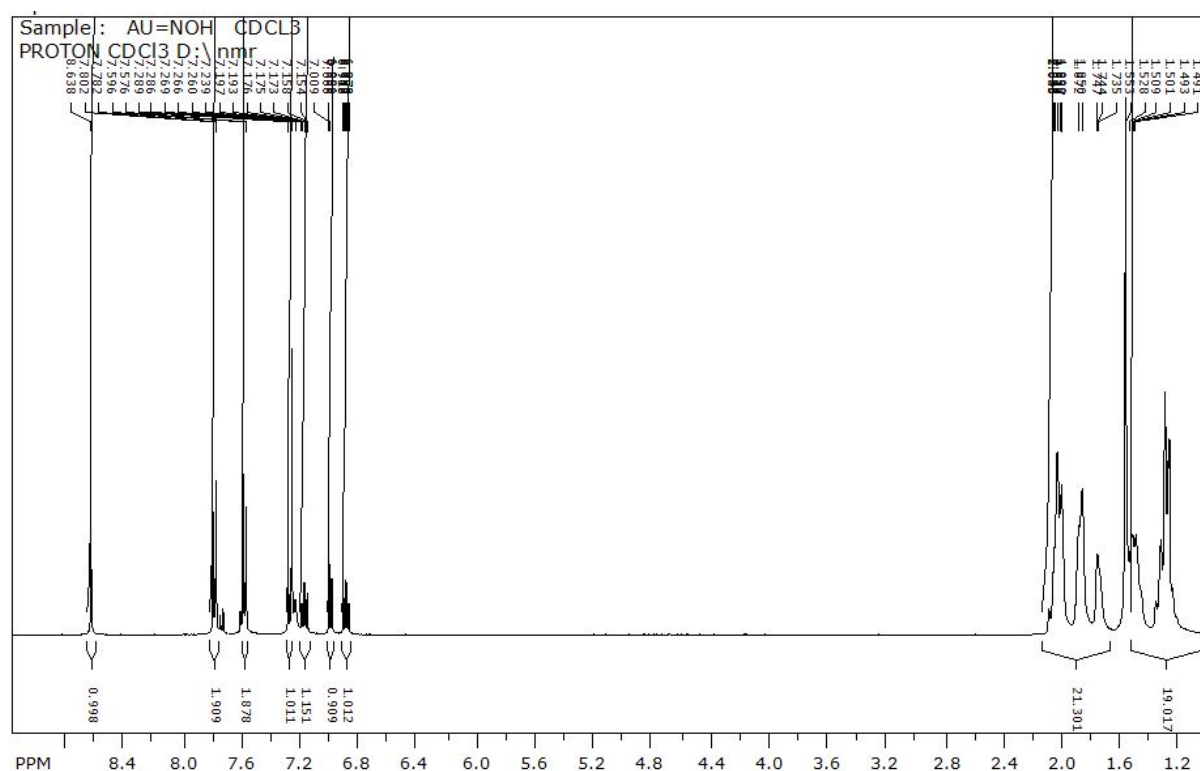Figure S4.  $^1\text{H}$  NMR for complex 5.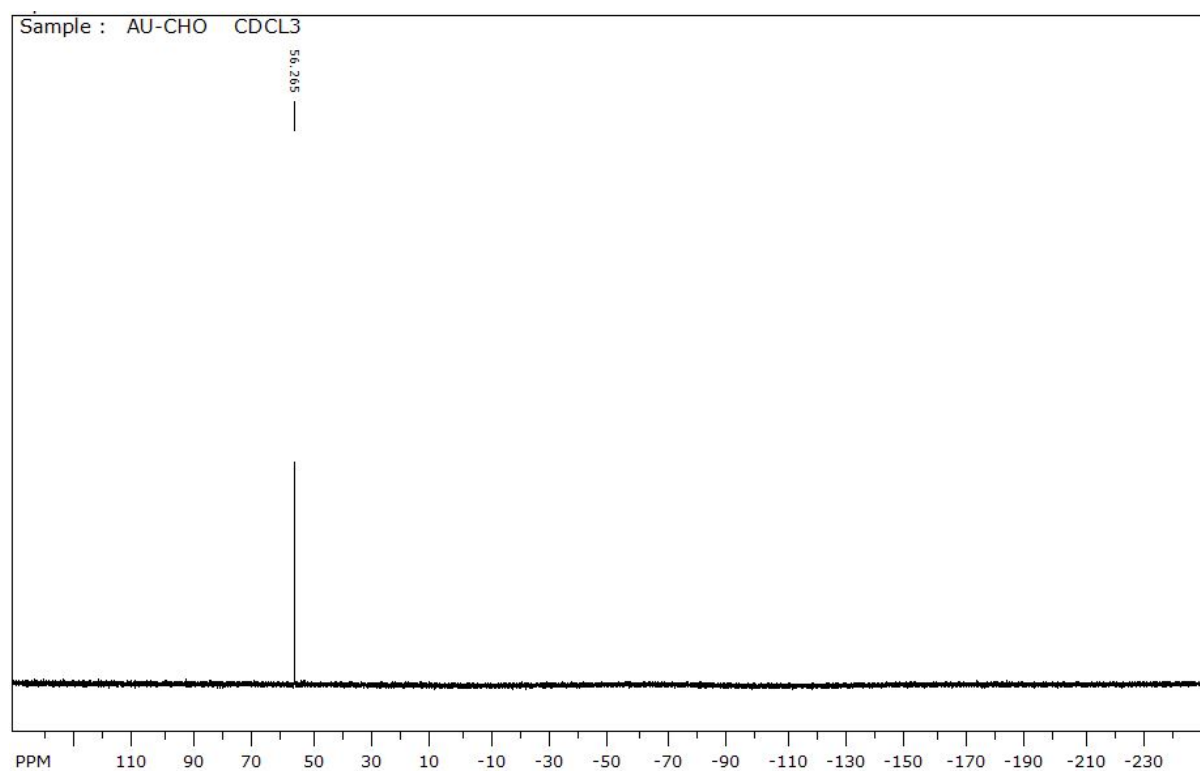Figure S5.  $^{31}\text{P}$  NMR for complex 2.

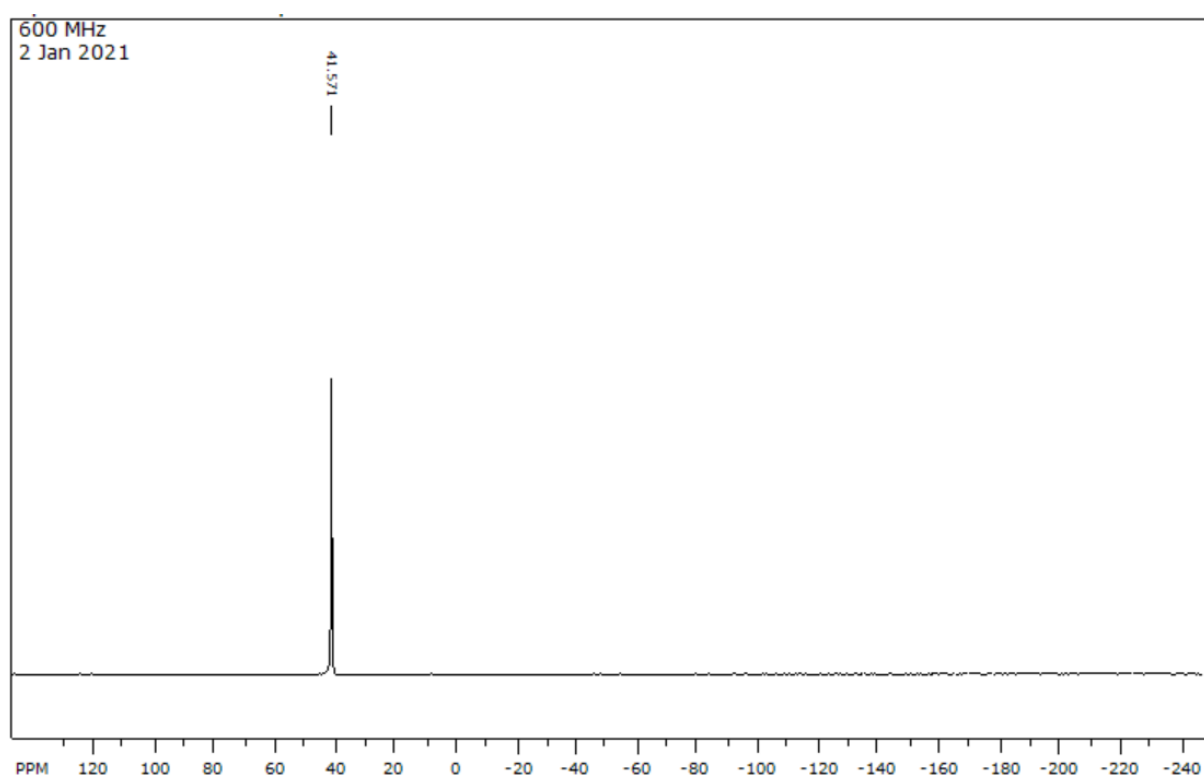

Figure S6.  $^{31}\text{P}$  NMR for complex 3.

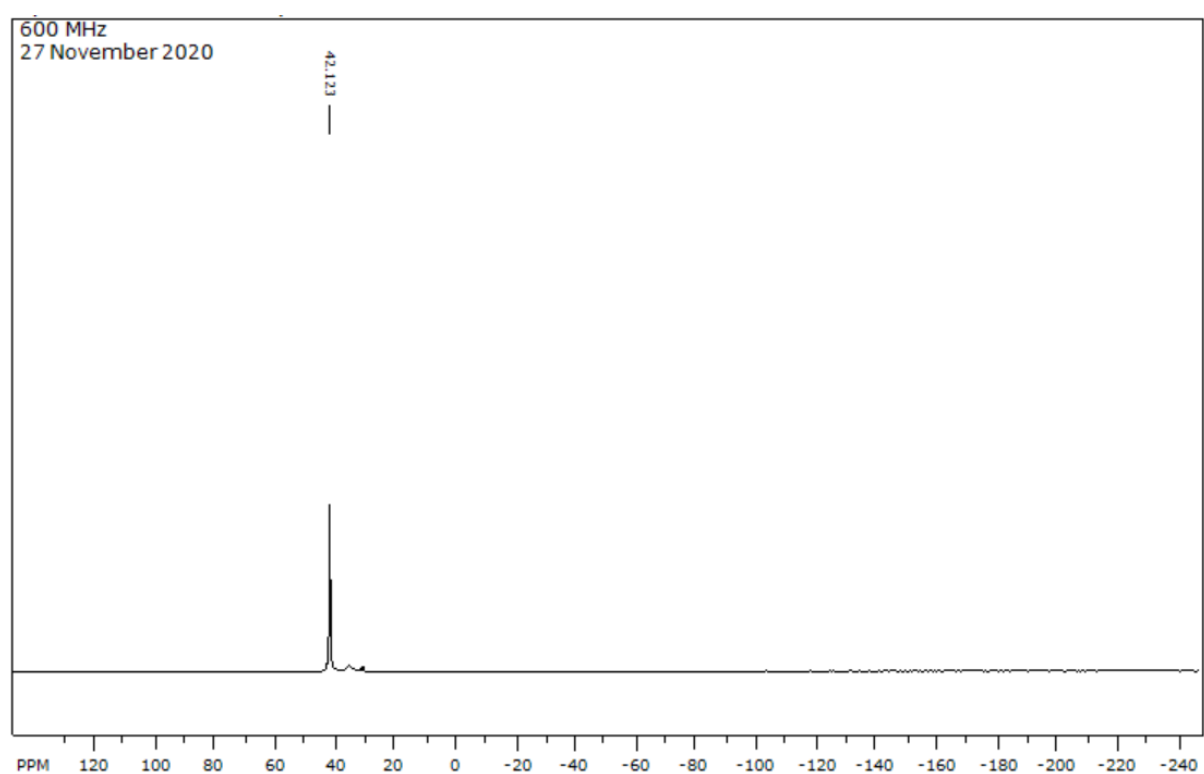

Figure S7.  $^{31}\text{P}$  NMR for complex 4.

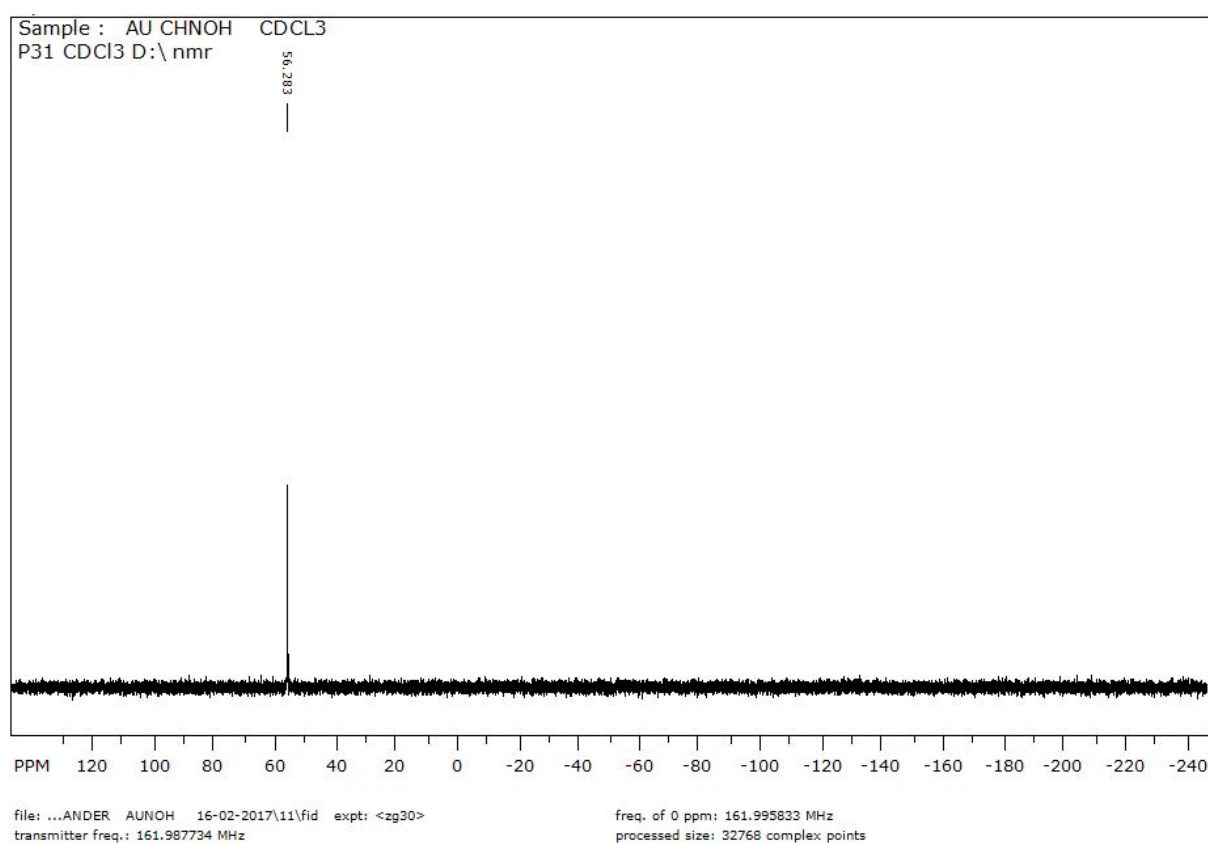

Figure S8.  $^{31}\text{P}$  NMR for complex 5.
